# Supplementary material for: Investigation of the Antibacterial Activity and Efflux Pump Inhibitory Effect of Cycas thouarsii R.Br. Extract against Klebsiella pneumoniae Clinical Isolates
Source: MDPI journal article supplement (doi:10.3390/ph14080756), 2021-08-01
Supplement: s1 [file s1]

### **Supporting information**

## **Investigation of the antibacterial activity and efflux pump inhibitory effect of *Cycas thouarsii* R.Br. extract against *Klebsiella pneumoniae* clinical isolates.**

Walaa Negm<sup>1</sup>, Mona El-Asar<sup>1</sup>, Amal Abokamer<sup>2</sup>, Engy Elekhawwy<sup>2</sup>

<sup>1</sup> Pharmacognosy department, faculty of pharmacy, Tanta University, Tanta, El Gharbia governorate, Egypt.

<sup>2</sup> Pharmaceutical microbiology department, faculty of pharmacy, Tanta University, Tanta, El Gharbia governorate, Egypt.

Table S1: Sequences of oligonucleotides utilized in RT-PCR

| Tested genes | Primer* | Sequence                    |
|--------------|---------|-----------------------------|
| <i>norE</i>  | F       | 5'-TCGCAGGACATCAGATTG-3'    |
|              | R       | 5'-CAGACACCCACCATAAGC-3'    |
| <i>acrB</i>  | F       | 5'-GAAGAGCACGCACCACTACAC-3' |
|              | R       | 5'-GCAGACGCACGAACAGATAGG-3' |
| <i>mdfA</i>  | F       | 5'-TTTATGCTTTCGGTATTGG-3'   |
|              | R       | 5'-GAGATTAAACAGTCCGTTGC-3'  |
| <i>yihV</i>  | F       | 5'- GGCTATCATCCTCGTCTTCC-3' |
|              | R       | 5'- GCGTCATCCACCAGTAACC-3'  |
| <i>gapA</i>  | F       | 5'-GGACGAAGTTGGTGTGAC-3'    |
|              | R       | 5'-TTCTGAGTAGCGGTAGTAGC-3'  |

\*F: forward, R: reverse

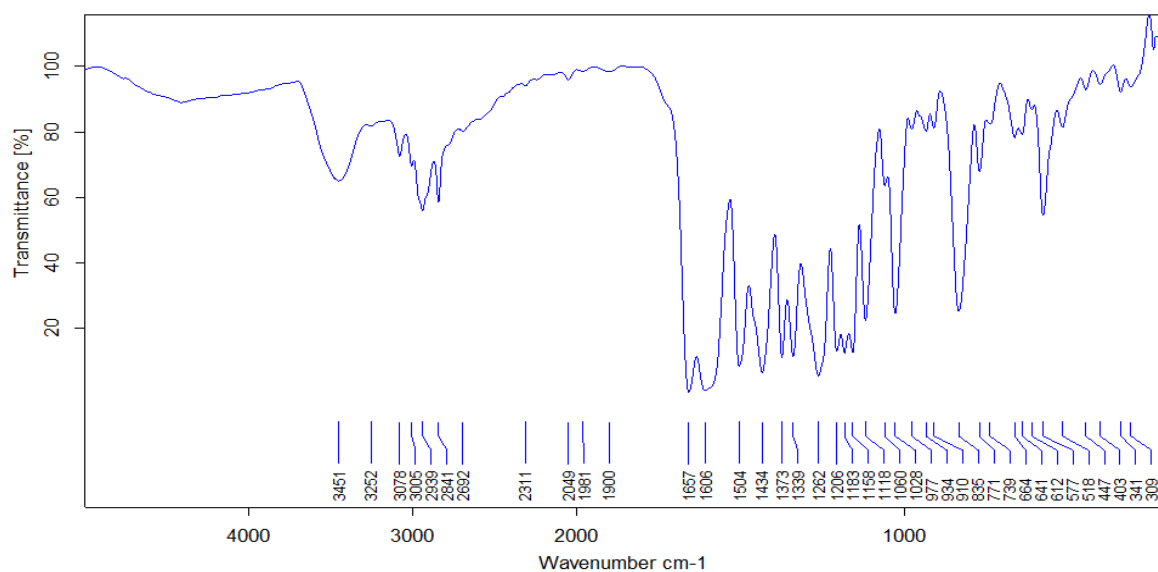

Figure S1. IR spectrum of compound 3

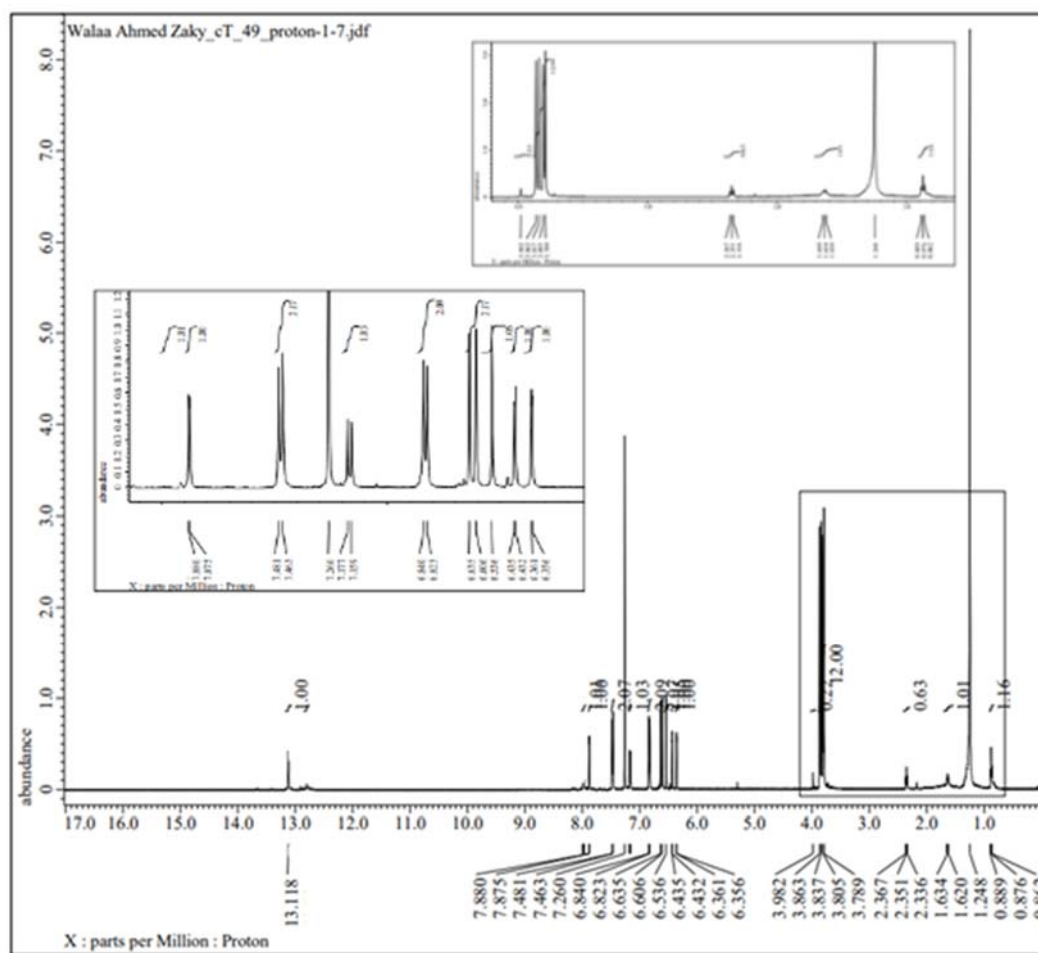

Figure S2. <sup>1</sup>H-NMR spectrum of compound 3

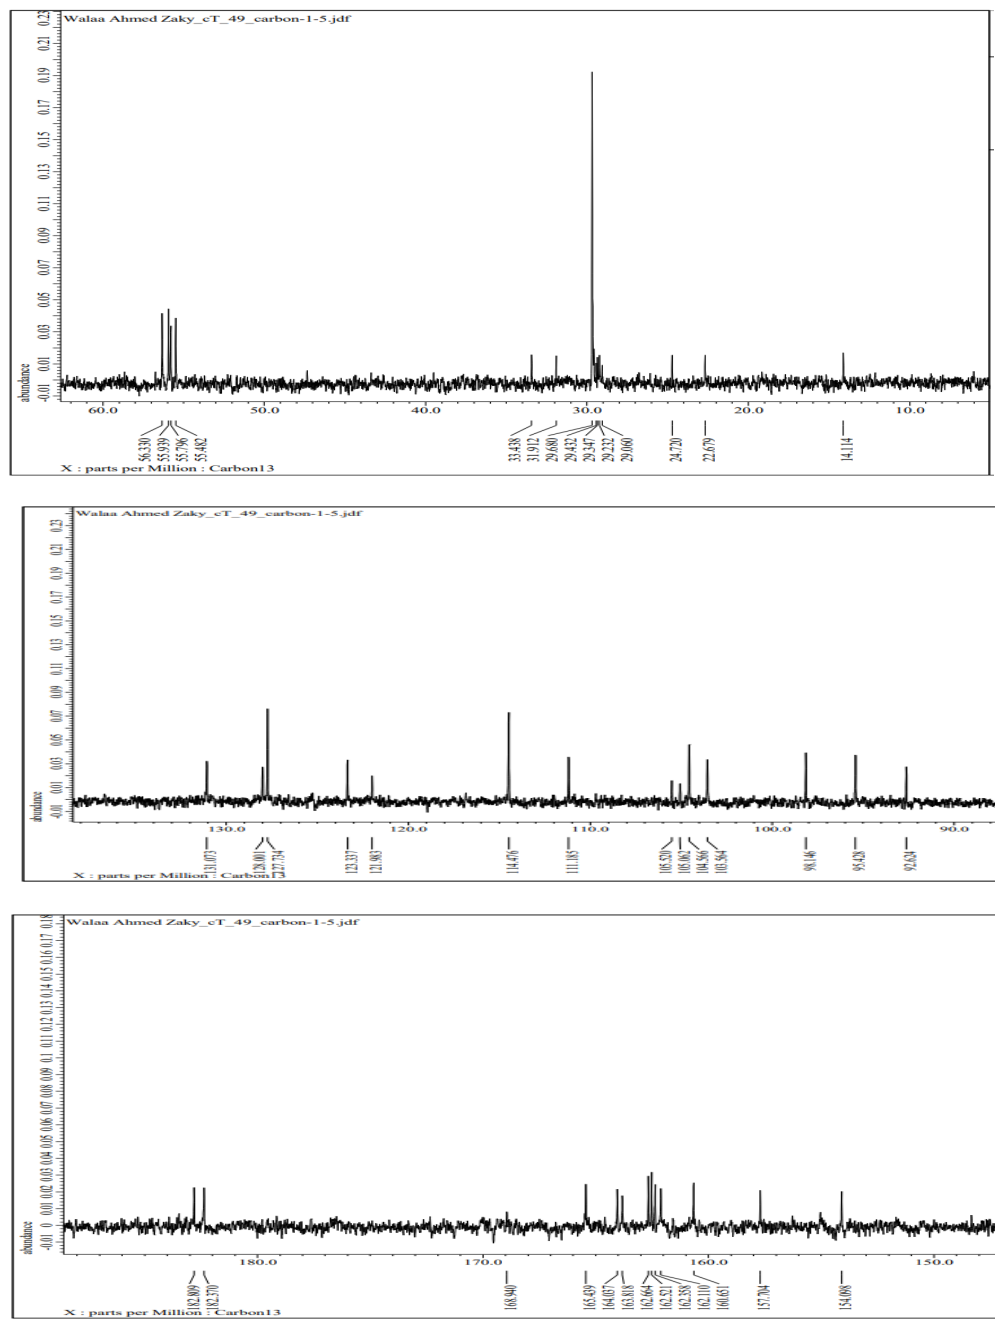

Figure S3.  $^{13}\text{C}$ -NMR spectrum of compound 3

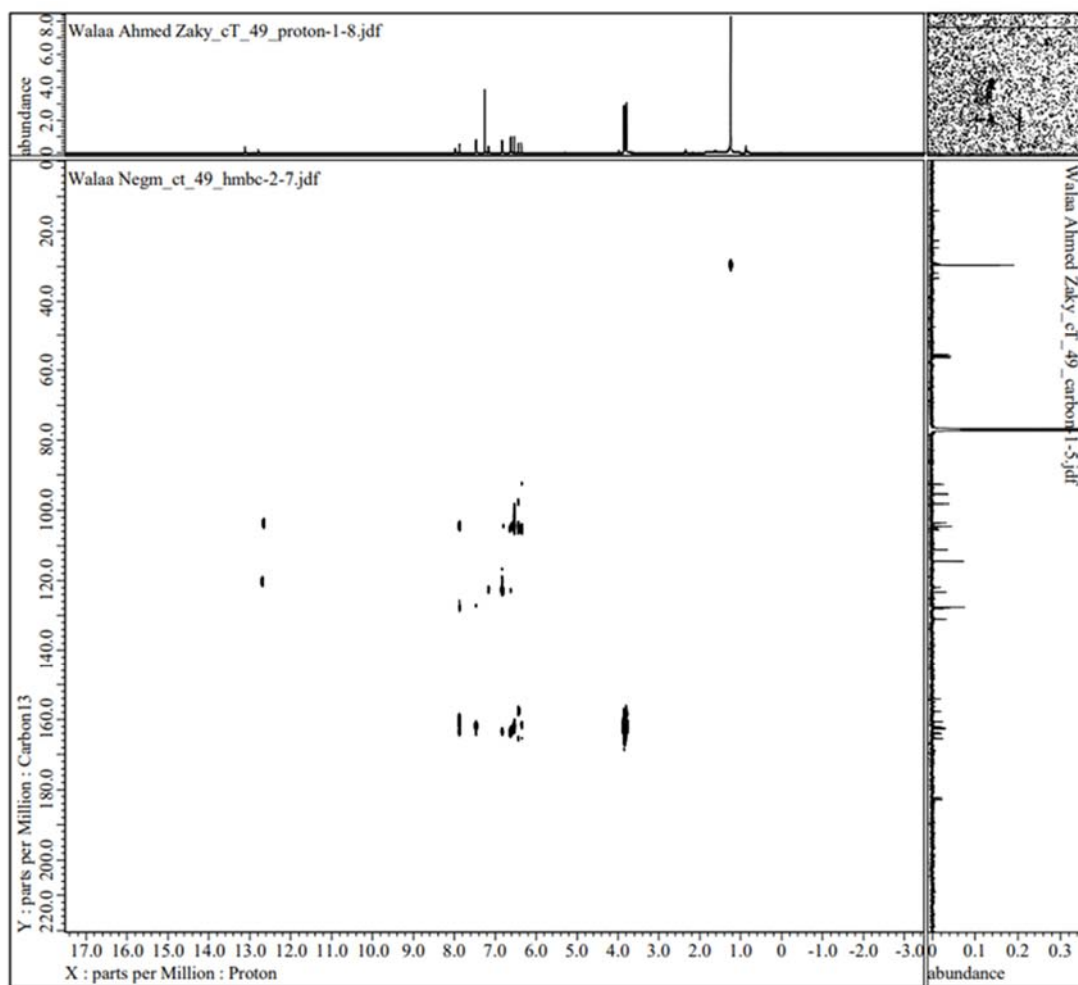

Figure S4. HMBC spectrum of compound 3

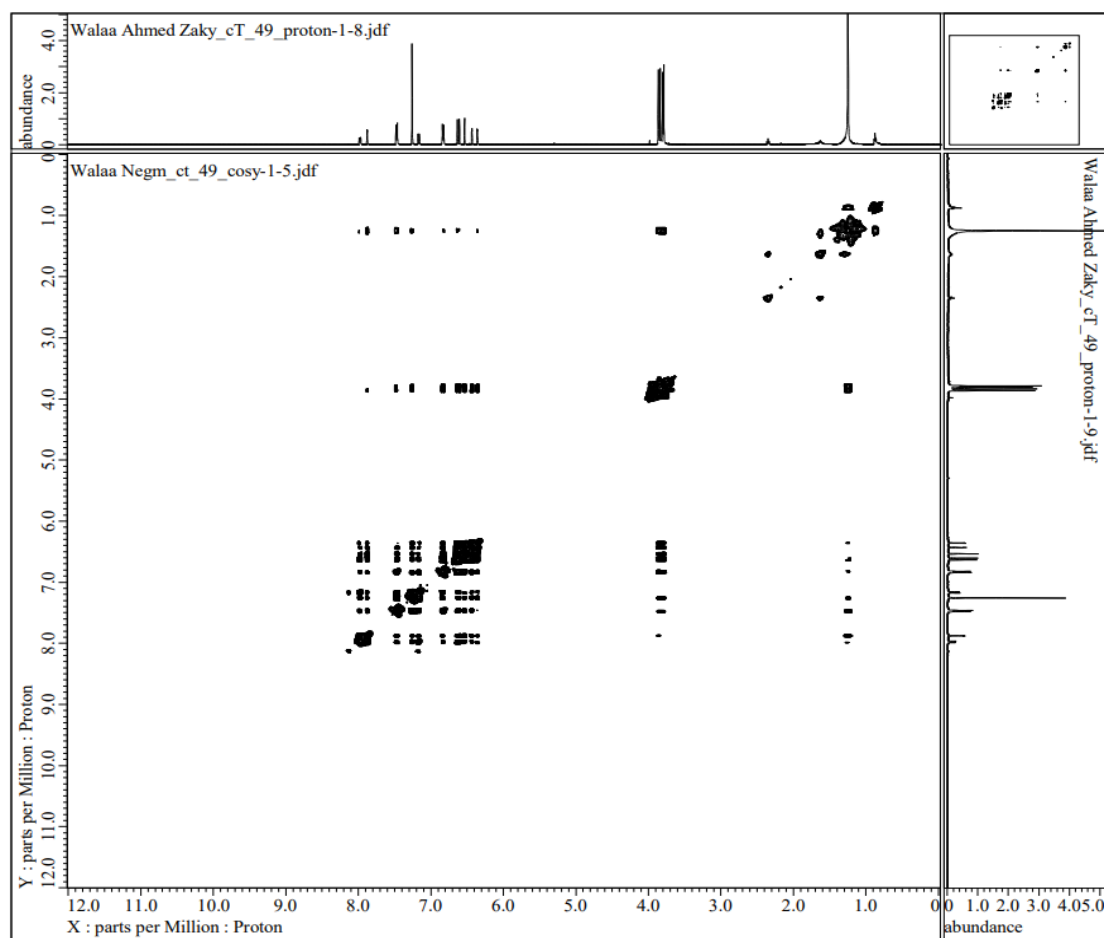

Figure S5. COSY spectrum of compound 3

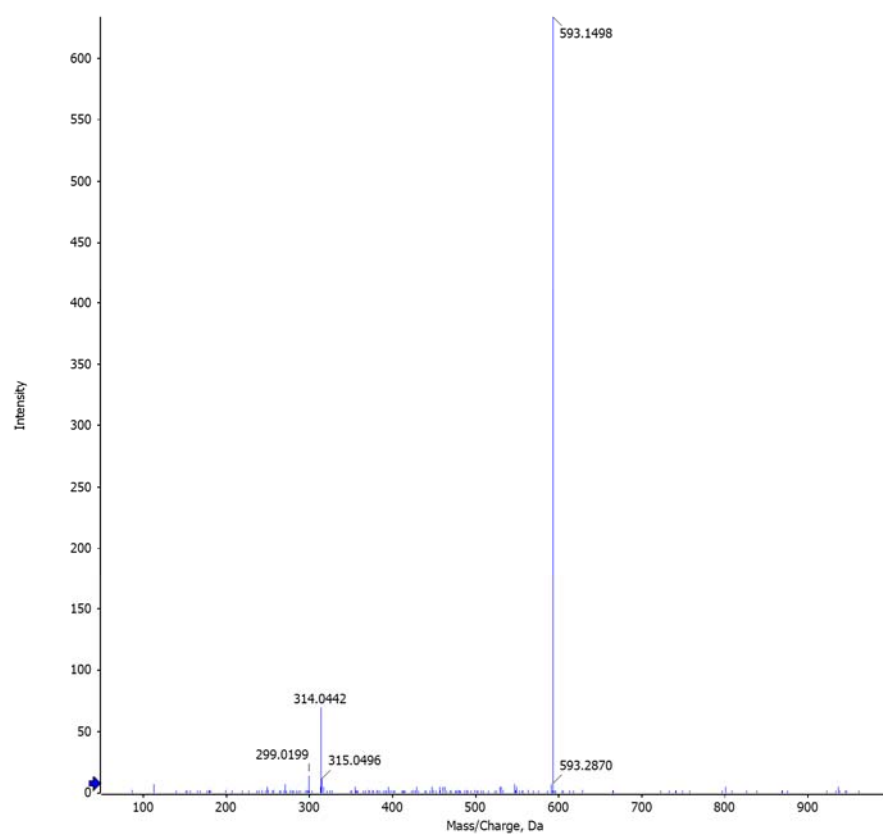

**Figure S6.** ESI mass spectrum of compound **3**

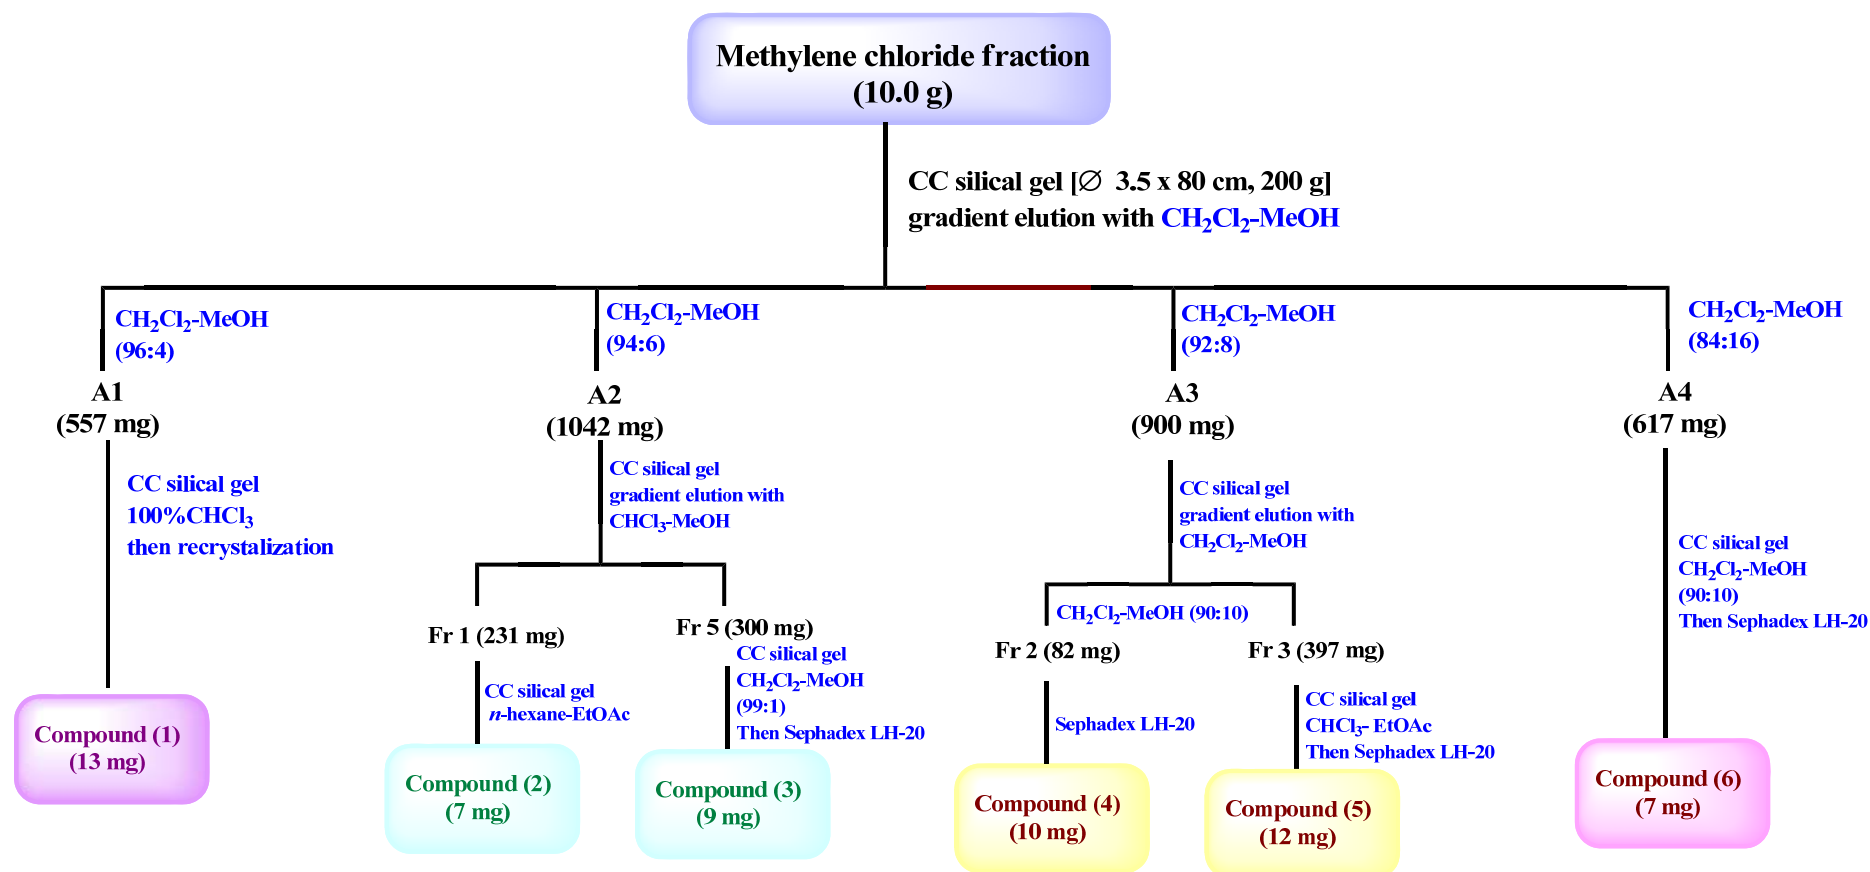

**Scheme S1.** Column chromatography of methylene chloride fraction of *Cycas thouarsii* leaves.
